# Supplementary material for: Reply to: Early-life respiratory infections and pre-adult asthma: could there be an interaction and differential misclassification?
Source: PubMed Central journal article supplement — Eur Respir J. 2022 Nov 10;60(5):2201384. doi: 10.1183/13993003.01384-2022 (PMC9647075; doi:10.1183/13993003.01384-2022), 2022-11-10

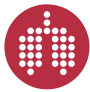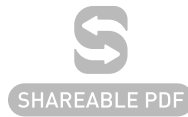

# Reply to: Early-life respiratory infections and pre-adult asthma: could there be an interaction and differential misclassification?

Evelien R. van Meel<sup>1,2</sup> and Liesbeth Duijts <sup>2,3</sup> on behalf of the participating authors of the meta-analysis “Early-life respiratory tract infections and the risk of school-age lower lung function and asthma”

<sup>1</sup>The Generation R Study Group, Erasmus MC, University Medical Center Rotterdam, Rotterdam, The Netherlands. <sup>2</sup>Dept of Pediatrics, Division of Respiratory Medicine and Allergology, Erasmus MC, University Medical Center Rotterdam, Rotterdam, The Netherlands. <sup>3</sup>Dept of Pediatrics, Division of Neonatology, Erasmus MC, University Medical Center Rotterdam, Rotterdam, The Netherlands.

Corresponding author: Evelien R. van Meel (e.vanmeel@erasmusmc.nl)

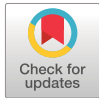

Shareable abstract (@ERSpublications)

**Upper respiratory tract infections solely in early life are associated with school-age asthma as well, although not as strongly as lower respiratory tract infections solely or both combined**  
<https://bit.ly/3ocwwAD>

**Cite this article as:** van Meel ER, Duijts L. Reply to: Early-life respiratory infections and pre-adult asthma: could there be an interaction and differential misclassification?. *Eur Respir J* 2022; 60: 2201384 [DOI: 10.1183/13993003.01384-2022].

This single-page version can be shared freely online.

Copyright ©The authors 2022

This version is distributed under the terms of the Creative Commons Attribution Non-Commercial Licence 4.0. For commercial reproduction rights and permissions contact [permissions@ersnet.org](mailto:permissions@ersnet.org)

Received: 9 July 2022  
Accepted: 11 July 2022

*Reply to J.L. Perret and co-workers:*

We have read the correspondence of J.L. Perret and co-workers regarding our meta-analyses on early-life respiratory tract infections and the risk of school-age lower lung function and asthma [1] with great interest, and thank them for their critical appraisal. In their correspondence, two main comments are raised. First, whether children with upper respiratory tract infections *without* (concomitant) lower respiratory tract infections in early life would have similar odds of school-age asthma as presented, and second, whether differential misclassification of school-age asthma might have affected our findings of the association of upper respiratory tract infections in early life with school-age asthma.

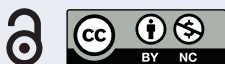

Supplement: ERJ-01384-2022.Shareable.pdf [file ERJ-01384-2022.Shareable.pdf]
